# Supplementary material
Source: PubMed Central journal article supplement (PMC3131316)
Supplement: 1018448108_Appendix.pdf [file 1018448108_Appendix.pdf]

## **Supplementary Online Material (SOM)**

### **The MspJI family of modification-dependent restriction endonucleases for epigenetic studies**

Devora Cohen-Karni<sup>1,2</sup>, Derrick Xu<sup>2</sup>, Lynne Aponé<sup>2</sup>, Alexy Formenkov<sup>2</sup>, Zhiyi Sun<sup>2</sup>, Paul J. Davis<sup>2</sup>, Shannon Kinney<sup>2</sup>, Megumu Yamada-Mabuchi<sup>2</sup>, Shuang-yong Xu<sup>2</sup>, Theodore Davis<sup>2</sup>, Sriharsa Pradhan<sup>2</sup>, Richard J. Roberts<sup>2</sup>, Yu Zheng<sup>2,\*</sup>

1. MCBB program, Boston University, Boston, MA 02215
2. New England Biolabs Inc., 240 County Road, Ipswich, MA 01938

\*correspondence: [zhengy@neb.com](mailto:zhengy@neb.com)

Telephone: 1-978-380-7441

## **Cloning, protein expression and purification**

The synthetic genes for MspJI, FspEI, LpnPI, AspBHI, RlaI and SgrTI were codon-optimized using in-house software for expression in *E. coli*. Cassettes of synthetic DNA (~500 bp) were first assembled using overlapping PCR from oligonucleotide DNA and then joined by USER cloning (1).

The synthetic MspJI, FspEI, LpnPI and SgrTI genes were each ligated into pTXB1 with an N-terminal His-tag and expressed in a *dcm*<sup>-</sup> *E. coli* strain T7 Express (C2566). Clones were grown in LB-Amp to OD<sub>600</sub> 0.6~0.8 and induced with a final concentration of 0.5 mM IPTG. Induced cultures were then grown overnight at 25 °C and stored as frozen cell pellets at -20 °C. Each resuspended cell pellet was sonicated and the cleared lysate was collected after centrifugation. All purifications were carried out using an AKTA FPLC machine (GE Healthcare). MspJI was first purified on a HiTrap Heparin HP column, then a HisTrap HP column, and a final HiTrap SP column. FspEI, LpnPI and SgrTI were first purified on a HisTrap HP column, followed by a HiTrap Heparin HP column. The endonuclease activities of the fractions were assayed on regular  $\lambda$  DNA, which is partially *dcm* methylated. Each final protein product appeared as a single band on SDS-PAGE (Figure S1). The final concentrations of MspJI, FspEI and LpnPI after purification were estimated to be 1.3 mg/ml, 1 mg/ml and 2.3 mg/ml, respectively.

The synthetic RlaI and AspBHI genes were ligated into the vector pET21a and expressed in *E. coli* strain T7 Express (C2566). AspBHI endonuclease was purified by chromatography through Heparin DM, Bio-Gel HTP hydroxyapatite, Mono Q, and Heparin TSK columns. RlaI purification included an additional purification step on an HTP ceramic column following the Mono Q column. Each final protein product appeared as a single band on SDS-PAGE (Figure S1). The final concentrations of RlaI and AspBHI after purification were estimated to be 0.8 mg/ml, and 1 mg/ml respectively.

## **Unit definition of the enzymes**

The cleavage efficiency of MspJI is enhanced by supplying short oligonucleotides with a methylated site, as previously shown (2). We found that this stimulation effect is a general property for the MspJI family of enzymes. Based on this, we define one unit as the amount of enzyme required to digest 1  $\mu$ g of pBR322 (*dcm*<sup>+</sup>) plasmid DNA to a stable pattern in the presence of 0.3  $\mu$ M activator in one hour at 37°C in a total volume of 50 $\mu$ l. The sequence and structure of the activator can be found in the Supplementary Materials (Figure S2).

All digestion reactions were carried out in standard NEB buffer 4 (50 mM potassium acetate, 20 mM Tris-acetate, 10 mM magnesium acetate, 1 mM dithiothreitol, pH 7.9 at 25°C). pBR322 (*dcm*<sup>+</sup>) was from NEB and pBR322 (*dcm*<sup>-</sup>) was prepared using a *dam*<sup>-</sup>/*dcm*<sup>-</sup> *E. coli* strain (#C2925, NEB).

T4αgt57βgt14 (3) and wild-type (hereafter T4 gt and T4 wt) genomic DNA were purified from phage cultures. 1 μg of DNA substrate was digested by 1 unit of each enzyme in the presence of 0.3 μM double-stranded DNA activator in a 50 μl volume. All reactions were incubated for 4 hours at 37 °C. The reaction products were resolved on a 1% agarose gel.

DNA oligonucleotides with or without internal methylated cytosines were synthesized either in-house or at Integrated DNA Technologies (IDT). In the digestion series used for sequence specificity determination, those used for cleavage site determination, and those to explore the consequences of multiple neighboring recognition elements (presented in Figure 2, Figure 3 and Figure S3), approximately 1 μM double-stranded oligonucleotides were digested by 1 unit of each enzyme in the absence or presence of 1.5 μM double-stranded DNA activator in a 10 μl volume. All reactions were incubated for 4 hours at 37°C. The reaction products were resolved using a 20% polyacrylamide 7M urea denaturing gel (Figure 2) or TBE native gel electrophoresis (Figure 3 and Figure S3).

### **Genomic DNA digestion**

All genomic DNA digestion reactions were carried out in standard NEB buffer 4. Genomic DNA samples of HeLa and Jurkat cell DNA as well as 5-Aza-dC-treated (#N4003S) and enzymatically <sup>m</sup>CpG-methylated Jurkat cell DNA (#N4002S) were obtained from NEB, while other genomic DNAs were purchased from BioChain. [[ Rabbit (Normal Rabbit Liver DNA Cat# D1834149, Lot #A802114), Corn (Normal plant Corn DNA Cat#D1634330, Lot #B307105) and Soy Bean (Normal plant Soy Bean DNA Cat# D1634370, Lot # B307107) DNA were purchased from BioChain (BioChain Institute, Inc. Hayward, CA) ]. 1 μg of DNA substrate was digested by 1 unit of each enzyme in the presence of 0.5 μM double-stranded DNA activator in a 30 μl volume at 37 °C for 16 hours. The reactions were then subjected to a 20% TBE native polyacrylamide gel electrophoresis (PAGE), and visualized by SYBR GOLD staining. Densitometry was performed on the Typhoon image using ImageQuant software (Figure 4B).

### **IMR90 Cell culture and DNA purification**

IMR90 human lung fibroblasts were purchased from American Type Culture Collection (ATCC, Manassas, VA). Cells were maintained in Eagle's minimum essential medium with glutamine (EMEM; ATCC), 10% fetal bovine serum (Gemini BioProducts, West Sacramento, CA), and non-essential amino acids (ThermoFisher Scientific, Pittsburgh, PA). Cultures were maintained in a humidity controlled incubator at 37 °C with 5% CO<sub>2</sub>. Confluent cells were harvested by trypsinization for purification of genomic DNA. Genomic DNA was isolated using the Genra Puregene Cell Kit (Qiagen, Valencia, CA)

as per the manufacturer's protocol. DNA purity and concentration were determined by Nanodrop before further analysis.

### **Sequencing - library construction**

Purified IMR90 DNA was digested using MspJI (2 units of MspJI to each 1ug of genomic DNA) in the presence of activator (~0.5μM), and subjected to 10% TBE-PAGE gel. The 32-mer band was excised from the gel, and the DNA was extracted from the gel piece by soaking and centrifugation. Recovered DNA was used to construct sequencing library using the NEBNext ChIP-Seq kit which included DNA end-repair, adapters ligation and PCR amplification (NEBNext® ChIP-Seq Sample Prep Master Mix Set 1, E6240S). The final library was sequenced in-house using the SOLiD platform with 35 cycles according to the manufacturer's protocols.

### **Bioinformatic analysis**

All 35-bp reads were aligned to the human reference (hg18) using bowtie (-n 0 -l 30 -e 500 -k 5 -best --strata) in sequence space (4). From the 5 best hits, the one which has the longest match to the reference is selected. If a read has multiple equally good hits, it is then discarded. Because of the general poor sequencing quality in the P2 adaptor region, identification of the P2 adaptor in the read is by heuristic rules. For example, if a read ends with AGA (the beginning sequence of the P2 adaptor) and has at least 1 mismatch in the last 3 bases, we consider it as a 32-mer. Or, if a read has the first mismatch at position 33, we consider it as a 32-mer. If all the 35 bases match to the reference, it is then considered to contain no less than 35-bp genomic fragment. Reads are classified into 30-35mer groups and sequence logos are constructed using weblogo (5).

For the subset of the Salk reference, we first chose fully methylated CG sites from the published IMR90 data (6). We then identified suitable MspJI recognition sites YNCGNR and extracted 32-mer sequences around these sites from the human reference genome. These 32-mers are then matched back to the human reference (hg18) using bowtie with option -m 1 to suppress multiple hits. The reported 32-mers are included into the reference subset.

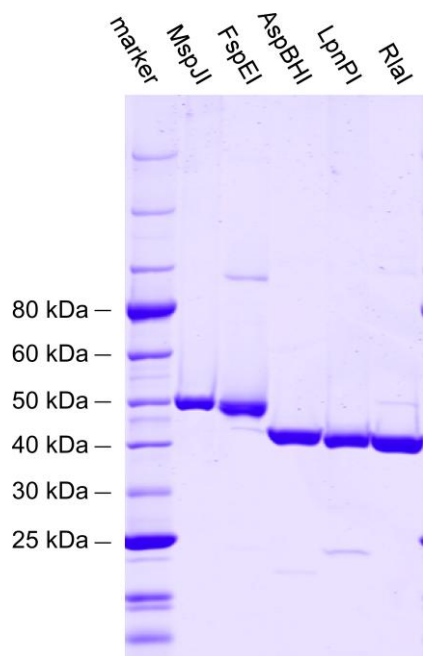

### SOM Figure S1. SDS-PAGE of the purified enzymes

MspJI and homologs were over-expressed in *E. coli* and purified as described in Materials and Methods section. The purified proteins were resolved using a 4-20% gradient SDS-PAGE

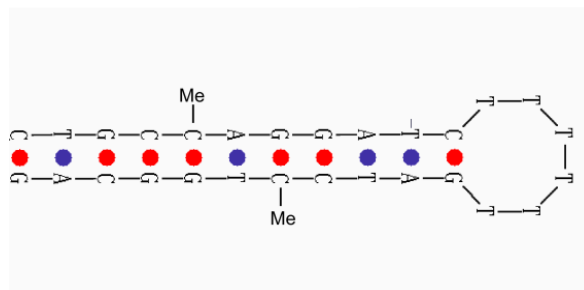

### SOM Figure S2. The activator

The activator is a short double-stranded oligonucleotide. It contains two methylated sites, but it is too short to allow cleavage.

The full activator sequence is: **CTGC<sup>m</sup>CAGGATCTTTTGGATC<sup>m</sup>CTGGCAG** . The stem-loop structure it forms upon annealing is presented in this figure. The activator was previously found to stimulate MspJI digestion. The same effect was observed for all the homologous enzymes.

**(A) distance(mC-mC) > 28 bp**

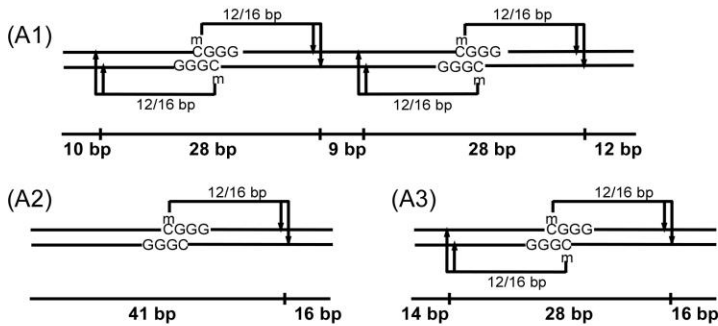

**(B) 15 bp ≤ distance(mC-mC) = 20 bp < 28 bp**

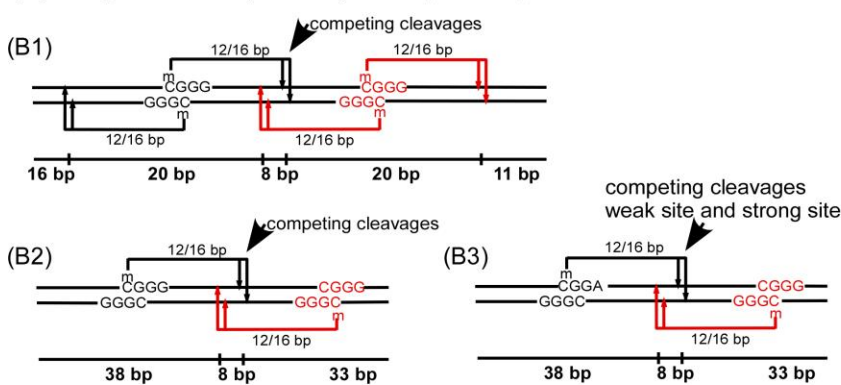

**(C) distance(mC-mC) = 10 bp < 15 bp**

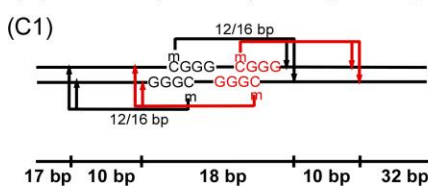

**(D)**

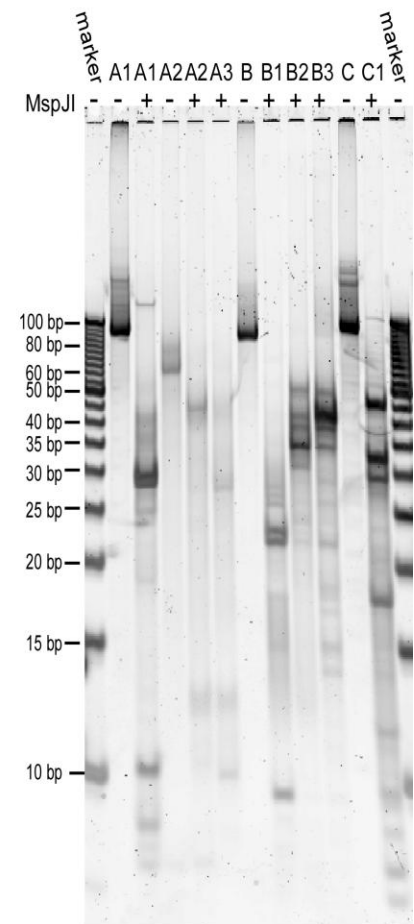

**SOM Figure S3. Different MspJI cleavage scenarios**

Experimental results for the possible cleavage scenarios are presented here. (A), (B) and (C) present the specific oligonucleotides labeled A1 – C1. The resulting digests, resolved on 20% TBE-PAGE are presented in (D).

In genomic DNA, isolated recognition sites, where the distance between the closest modified cytosines (mC) is larger than 28 nucleotides, will be cleaved independently, either on both sides or on one side depending on the sequence context flanking the mC (Figure S3A). In the human genome, approximately 50% of all the CpG sites fall into this category (assuming they are all methylated). However, genomic DNA also will often contain modification at closely spaced sites, thus the cleavage pattern obtained in a

digestion using MspJI-like enzymes will depend on the distance between the neighboring recognition sites. Some examples of different disposition of nearby mC sites (designated “cleavage scenarios” for convenience) were explored in Figure S3. Recognition sites where the distance between the two mCs is less than 28 nucleotides but larger than 15 nucleotides, will affect each other’s cleavage pattern and will depend on the order of cleavage (Figure S3 lanes B1–B3). In such scenarios, fragments shorter than 32 nucleotides can be formed. For two recognition sites within 15 bases of each other, the final products also depend on the cleavage order (Figure S3 lane C1). More complex scenarios may arise when more than two neighboring recognition sites occur within 28 bases of each other. Thus, closely clustered <sup>m</sup>CpG sites as found in CpG islands may potentially reduce the amount of 32-mer produced during digestion.

```

Conservation:          9                               6 9 69 696 9
FspEI                 1 MQSTGVRPCPLASVAVA--TEVATPGGASDARCLDEPSSGLGLSRAVDDKSQVVPFVDLPTAALVVDQLY 68
SgrTI                 1 -----MPLADAPV-----PHVTFAEILTDDLVVDVAVY 27
LpnPI                 1 M-----KIYSFDTLANADLIIDAVY 20
AspBHI               1 M-----TFFTGETLQVDLIVDAVY 20
RlaI                 1 M-----QRIAFEKLTADLFVDAVY 20
MspJI                 1 MN-----GPKADIAWAASAEVANK-----PRLVVFVGDDEL-----RY 31
Consensus_ss:                eeee          hhhhhhhh

Conservation:          6           66 6           6666           6 66 6
FspEI                 69 EGG-----TAGTLADDP LARLLP-VGNQGGFRYAG---SPRKGTVRLSVLYTT----- 112
SgrTI                 28 AGG-----SSGHTGDDPMSKI IKGIGNQGGFRYAG---SPALGTVKLAVLYTS----- 72
LpnPI                 21 EGG-----SSGNASDDP LSKIKGIGNMGFFRSAG---QGI F--KKLIVLYTN----- 63
AspBHI               21 AGYK-----TERGGMADPLVPLVG-VSRQGGFRYRG---TRER--PTLLVLTNS----- 63
RlaI                 21 ESN-----GATNLNGDVL SKLMS-VGTQGGFRVFNIRNQKCK--AAIVIVLEST----- 65
MspJI                 32 AQQANQRDVELDGFVNYHWLTS PGGGLGLPKVMLEA-GINAPAEVVPF---DRSR--RALIAIRSSPWKAG 95
Consensus_ss:                hhhhh          ee          e eeeeeee

Conservation:          9 9 9 9 969966 66 66 6 66 9 6           9 99 6 9
FspEI                 113 GAVADWPD TLDPSTGVFTYYGDNRRKPGRDLDHTQRS GNLLLRDVF EHAHGSVEERRTVPPFLFETAP-- 180
SgrTI                 73 GGEVDWPDYLDVETGTFYYGDNRRPGQSLHETPRSGNILLRDAFAASHGTPADRSKVPPFFLFEKAA-- 140
LpnPI                 64 MEDGDWPDSDIDTSKQFIYYGDNKHPGHDIHDTPRQGNATL KMLFDS THNEKDARRIVPP I FIVKYPTA 133
AspBHI               64 LAEPEWPDQDDETTGTFIYYGDNRRHGRLLDHTPRFGNQLLRQIFDWAHL--QQRHLVPIIIVFTTEA-- 129
RlaI                 66 NKHPDWLDNIDYESGI IQYGDNRPEPGRHLHDSKRGKGNKVL RDVFEMLQD--NRRQEI PPFYFSE-- 130
MspJI                 96 HETNPWHDEFDLDHGVRYFGDHPSTVGLPGETKGNRL LLEAARLHAGTTRERLLAPPLFLFRAVTVH 165
Consensus_ss:                eeeee          hhhhhhhhhhh          hh          eeee

Conservation:          69 6 66 69           6 6 6 6           9 66696 6 6666           6 6 9
FspEI                 181 -PGRRIMFRGLLAPGAATLTSDDDLVAIWRNTRGRHFQNYRAHFTVLD--VATVTRTWLTDIL--AGHA- 244
SgrTI                 141 ARGRSVLF RGLLAPGGPNLTSDDDLAAIWRATDGRRFQNYRARFTVLE--VDRVPRAWIQHLLNGGDD- 206
LpnPI                 134 SSSRSVQFKGVAVPGYPGLSATDDLIAVWKTNGRQFQNYRAI FTILN--IPMYSRKNWNSLF-DF-- 197
AspBHI               130 -TGRTRFRFRGLAVPGSPALAAEDFDLWAKTTEGQRFQNYKAVFTILD--EAVI PRAWVHVAVG-RGE-- 192
RlaI                 131 -EGRNRFLGLLVPGSDFKLEELLVAIWRMKNGERYQNYKAVFTILD--VASVRGWLEDLI-SCNG- 194
MspJI                 166 RAGRAVVKGHVFCGAAIERLE-HVVQRDPETGRSFPNLSLDLAVVSGGEIDGVDFRWDIDRR-NAALA 233
Consensus_ss:                eee          ee          eeeee          ee          eeeee          hhhhhhhh

Conservation:          6 6 9 6 6 6           666 9 6           6 6 99 6
FspEI                 245 --TDSEHCP PAAWAVDGRAYSPLIAP---STTIIRTKAEQQPPDPTGVAILAAIREHYRGHEHDFEC 308
SgrTI                 207 --LDGE-CPDAWRTWTESRVYRPLIAP---STTVRSKADQLPGDAV GKAMLQEI RDIYFRGREHDFELC 269
LpnPI                 198 ---QDNSLNPFFYQWKISGKADVLIAP---STKTI RTQIQE QMPRTKLERELIQAVFDYFCEAPIKFEAC 260
AspBHI               193 ---TSLGAPVAVNAWLSAGGIRPLMAP---RSLVRSKAEQLPATPEDQALIEVIRQRYKNPFFGEAC 255
RlaI                 195 ---YQSDFAPEKWKWIDKGVYTPLYASD---SVLNYRTQDQQMPFKDDDKLQSIYDYF--DNPYEFEC 258
MspJI                 234 AGETLRHAPESWIRWVRQRLAIPGIRRRVLASAVQSSKEQQPASGSAEAATLQTLYKFVDRKHFELL 303
Consensus_ss:                hhh hhhhhhhh          hhhhh          hhhhhhhhhhhhh          hhhhhh

Conservation:          9 6           66 999 9 69 9           6 669966           666
FspEI                 309 AVELWRLIAPA---TGRCDVTPPSRDGGRDAIGDYILGPLSDPIAIDFALEAKCYTDT-----NSVGV 368
SgrTI                 270 AVAIWRLMAPS---TGAVDVTRPSRDGGRDAVGYLLGPAANRIAVDFALEAKCYGPD-----NSVGV 329
LpnPI                 261 AAKIFQLYDEN---VLIDEITRSVAVDGGKDAIGRYVLGIKEDPVEYAEFFLEAKCYQPLNGQININSVGV 326
AspBHI               256 AGALTRLLLPD---VARLDLTRPWRDGRDGI GRLRIGQSPAIEVDFALEAKCYGAN-----NAVGV 315
RlaI                 259 AMKIVQIMDSN---IHSLKHTRFVRDGRDAIGLYRIGRQCQDGVDFALEAKRYSSN-----DGIGV 318
MspJI                 304 ASRVAEVEFRESGARVKEGWLSRSSGDDGVDFIRGIDMGS LKASTPVVVLGQAKCIQPT-----SSVSF 367
Consensus_ss:                hhhhhhhh          eeeeeee          eeeeeee          eeeeeee          h          h

Conservation:          969666966 6 696 6996           966 96 9 696           6 66 6           6 66
FspEI                 369 RDVARLISRLRHRHFGVFI TSHFNQQVYTEVRTDRHPIALVSGRDI VNALRAH----GYADVNAVNAWL 434
SgrTI                 330 REVSRLISRLRHRNFGVLVTT SFLNKQVQDEIQEDGHPIALVCGRDIVEVLRQH----GRTTADSVRQWL 395
LpnPI                 327 KEVSRLISRIKRFQGLVTT SFTIAKQAYGEVREDGHPIVFLSGGDISRLIKK----GINSTDAVLAWL 392
AspBHI               316 KEVSRLISRIKHRFGVLVTT SYVDRQAYQEVTDGHPVILTTAQDIVGLLSA----GVRTPTQVDQWL 381
RlaI                 319 KEVSRLISRLRHRQFGLVTT SFVALQAYQEIKEDGHPIVIISGMDILRLIYDS----GIKTDEIQEWL 384
MspJI                 368 EQVARVVARLRGWIVYVTTGSFSRQAVEIIDQYVVLVLAGGTLAATVRRMVQANYGDDLALLAST 437
Consensus_ss:                hhhhhhhhhh          eeeee          hhhhhhhh          eeeee hhhhhhhh          hhhhhhhh

Conservation:          435 450
FspEI                 435 GKIPNVHVSAKGAPNF----- 450
SgrTI                 396 -----TQSFQP----- 402
LpnPI                 393 NSEFSKS----- 399
AspBHI               382 DGITASV----- 388
RlaI                 385 VKTFPKDE----- 392
MspJI                 438 VDEYGAAVTHR--RPEEVI SL 456
Consensus_ss:                hhhh

```

SOM Figure S4 Aligned sequence homologs of MspJI.



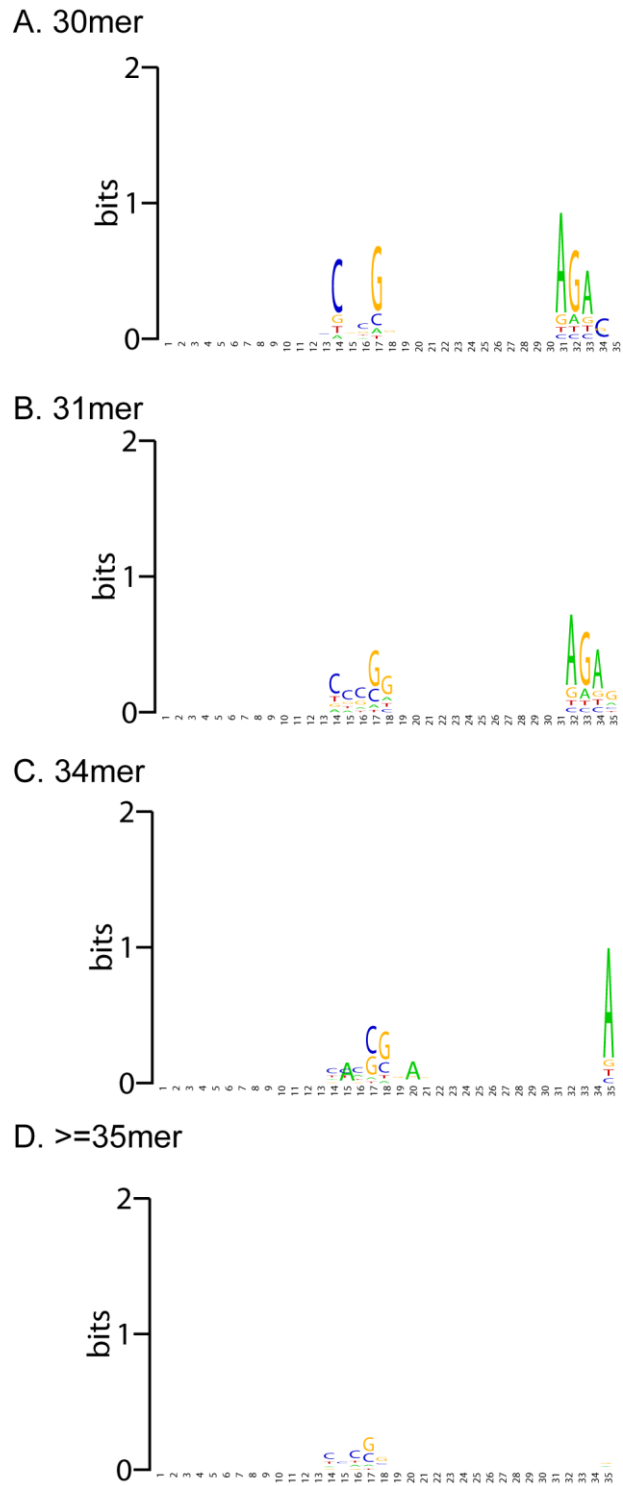

**SOM Figure S5. Sequence logo of the 30-mers (total 0.9M reads), 31mers (1.3M), 34-mers (0.7M), and  $\geq 35$ -mers (1.0M).**

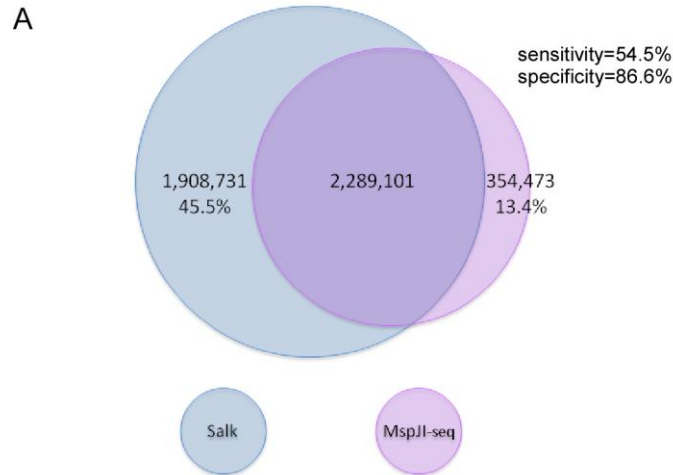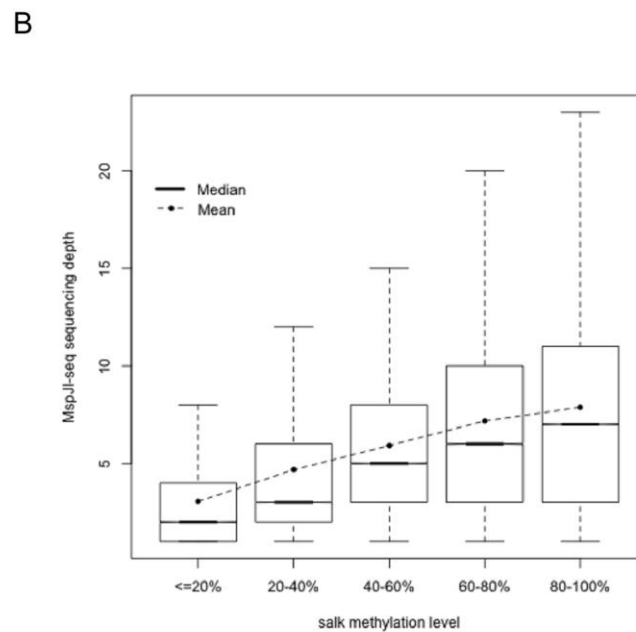

**SOM Figure S6. Comparison of the IMR90 MspJI-seq data and the Salk MethylC-seq data**

(A) Fully methylated CpG sites extracted from the pool of 32 and 33 bp reads of the MspJI-seq data were compared with a subset of the Salk MethylC-seq data which contain MspJI recognition sites. Three subgroups were identified: unique to the MspJI-seq, unique to the Salk subset and the overlap. The numbers in each subgroup and the percentages are also listed.

(B) Correlation between the MspJI-seq fold coverage and the Salk methylation level. Fully methylated CN<sup>m</sup>CGNG sites extracted from the pool of 32 and 33 bp reads of the MspJI-seq data were divided into 5 bins based on the Salk methylation level. The mean, median and overall distribution of the MspJI-seq fold coverage were illustrated by box plots and were compared across the 5 bins.

| Set                               |               | Sequence                                                                 |
|-----------------------------------|---------------|--------------------------------------------------------------------------|
| N <sup>m</sup> c <sub>g</sub> N   | Top strand    | CGGCGTTTCCGGGTTCCATAGGCTCCGCCN <sup>m</sup> CGNACTCTGATGACCAGGGGCATCACA  |
|                                   | Bottom strand | TGTGATGCCCTGGTCATCAGAGTN <sup>m</sup> CGNGGCGGAGCCTATGGAACCCGGAAACGCCG   |
| Nc <sup>m</sup> c <sub>g</sub> gN | Top strand    | CGGCGTTTCCGGGTTCCATAGGCTCCGCN <sup>m</sup> CGGNCTCTGATGACCAGGGGCATCACA   |
|                                   | Bottom strand | TGTGATGCCCTGGTCATCAGAGN <sup>m</sup> CGGNGCGGAGCCTATGGAACCCGGAAACGCCG    |
| Ng <sup>m</sup> c <sub>n</sub>    | Top strand    | CGGCGTTTCCGGGTTCCATAGGCTCCGCCN <sup>m</sup> CNACTCTGATGACCAGGGGCATCACA   |
|                                   | Bottom strand | TGTGATGCCCTGGTCATCAGAGTN <sup>m</sup> CNGGCGGAGCCTATGGAACCCGGAAACGCCG    |
| N <sup>m</sup> c <sub>n</sub> gN  | Top strand    | CGGCGTTTCCGGGTTCCATAGGCTCCGCCN <sup>m</sup> CNGNACTCTGATGACCAGGGGCATCACA |
|                                   | Bottom strand | TGTGATGCCCTGGTCATCAGAGTN <sup>m</sup> CNGNGGCGGAGCCTATGGAACCCGGAAACGCCG  |
| K <sup>m</sup> c <sub>W</sub> HR  | Top strand    | CGGCGTTTCCGGGTTCCATAGGCTCCGCC <sup>m</sup> CWHRACTCTGATGACCAGGGGCATCACA  |

**SOM Table S1. The full sequences of the oligonucleotides sets used for sequence specificity determination**

N represents any nucleotide among A,T,C or G, not a randomized nucleotide mix

### MspJI

| set  | N <sup>m</sup> c <sub>g</sub> N |      | Nc <sup>m</sup> c <sub>g</sub> gN |   | Ng <sup>m</sup> c <sub>n</sub> |      | N <sup>m</sup> c <sub>n</sub> NgN |       | N <sup>m</sup> c <sub>n</sub> NgN |       | K <sup>m</sup> c <sub>W</sub> H <sub>R</sub> |       |      |
|------|---------------------------------|------|-----------------------------------|---|--------------------------------|------|-----------------------------------|-------|-----------------------------------|-------|----------------------------------------------|-------|------|
| act. | -                               | +    | -                                 | + | -                              | +    | -                                 | +     | -                                 | +     | -                                            | +     |      |
| AcgA | +, -                            | +, - | AccggA                            | - | +, -                           | AgcA | -                                 | AcAgA | +                                 | TcAgC | -                                            | TcACA | +    |
| TcgT | +                               | +    | TccggT                            | - | -                              | TgcT | +                                 | TcTgT | -                                 | GcTgA | +                                            | TcACG | +    |
| AcgT | +, -                            | +, - | AccggT                            | - | -                              | AgcT | -                                 | AcTgA | +                                 | TcTgC | -                                            | TcAAA | +    |
| AcgT | +                               | +    | AccggT                            | - | -                              | AgcT | +                                 | TcAgT | -                                 | GcAgA | +                                            | TcAAG | +    |
| AcgC | +, -                            | +, - | AccggC                            | - | -                              | AgcC | -                                 | AcCgA | +, -                              | TcCgC | -                                            | TcATA | +    |
| GcgT | +                               | +    | GccggT                            | - | -                              | GgcT | +                                 | TcGgT | -                                 | GcGgA | +                                            | TcATG | +    |
| AcgG | +, -                            | +, - | AccggG                            | + | +                              | AgcG | -                                 | AcGgA | +                                 | TcGgC | -                                            | GcACA | +, - |
| CcgT | +                               | +    | CccggT                            | - | -                              | CgcT | +                                 | TcCgT | -                                 | GcCgA | +                                            | GcACG | +    |
| TcgA | -                               | +, - | TccggA                            | - | +, -                           | TgcA | -                                 | AcAgT | -                                 | TcAgG | N/T                                          | GcAAA | +, - |
| TcgA | +                               | +    | TccggA                            | + | +                              | TgcA | +                                 | AcTgT | -                                 | CcTgA | N/T                                          | GcAAG | +    |
| TcgC | +, -                            | +, - | TccggC                            | - | -                              | TgcC | -                                 | AcCgT | -                                 | TcTgG | +                                            | GcATA | +    |
| GcgA | +                               | +    | GccggA                            | - | +, -                           | GgcA | +                                 | AcGgT | -                                 | CcAgA | +                                            | GcATG | +    |
| TcgG | +, -                            | +, - | TccggG                            | + | +                              | TgcG | -                                 | AcAgC | -                                 | TcCgG | +                                            |       |      |
| CcgA | +                               | +    | CccggA                            | + | +                              | CgcA | +                                 | GcTgT | -                                 | CcGgA | +                                            |       |      |
| CcgC | +, -                            | +, - | CccggC                            | - | -                              | CgcC | -                                 | AcTgC | -                                 | TcGgG | +                                            |       |      |
| GcgG | +                               | +    | GccggG                            | + | +                              | GgcG | +                                 | GcAgT | -                                 | CcCgA | +                                            |       |      |
| CcgG | +, -                            | +, - | CccggG                            | + | +                              | CgcG | -                                 | AcCgC | -                                 | CcAgC | -                                            |       |      |
| CcgG | +                               | +    | CccggG                            | + | +                              | CgcG | +                                 | GcGgT | -                                 | GcTgG | +                                            |       |      |
| GcgC | +, -                            | +, - | GccggC                            | - | -                              | GgcC | -                                 | AcGgC | -                                 | CcTgC | -                                            |       |      |
| GcgC | +                               | +    | GccggC                            | - | -                              | GgcC | +                                 | GcCgT | -                                 | GcAgG | +                                            |       |      |
|      |                                 |      |                                   |   |                                |      |                                   | AcAgG | +                                 | CcCgC | -                                            |       |      |
|      |                                 |      |                                   |   |                                |      |                                   | CcTgT | -                                 | GcGgG | +                                            |       |      |
|      |                                 |      |                                   |   |                                |      |                                   | AcTgG | +                                 | CcGgC | -                                            |       |      |
|      |                                 |      |                                   |   |                                |      |                                   | CcAgT | -                                 | GcCgG | +                                            |       |      |
|      |                                 |      |                                   |   |                                |      |                                   | AcCgG | +                                 | CcAgG | +                                            |       |      |
|      |                                 |      |                                   |   |                                |      |                                   | CcGgT | -                                 | CcTgG | +                                            |       |      |
|      |                                 |      |                                   |   |                                |      |                                   | AcGgG | +                                 | CcCgG | +                                            |       |      |
|      |                                 |      |                                   |   |                                |      |                                   | CcCgT | -                                 | CcGgG | +                                            |       |      |
|      |                                 |      |                                   |   |                                |      |                                   | TcAgA | +                                 | GcAgC | -                                            |       |      |
|      |                                 |      |                                   |   |                                |      |                                   | TcTgA | +                                 | GcTgC | -                                            |       |      |
|      |                                 |      |                                   |   |                                |      |                                   | TcCgA | +                                 | GcCgC | -                                            |       |      |
|      |                                 |      |                                   |   |                                |      |                                   | TcGgA | +                                 | GcGgC | -                                            |       |      |

**SOM Table S2. Results of oligonucleotide digestion by MspJI**

act. = activator; + = digested; - = undigested; +, - = partial digestion; N/T = not tested

### FspEI

| set  | N <sup>m</sup> cgN |     | Nc <sup>m</sup> cggN |     | Ng <sup>m</sup> cN |      | N <sup>m</sup> cNgN |   | N <sup>m</sup> cNgN |   | K <sup>m</sup> cWHR |       |     |     |       |   |   |
|------|--------------------|-----|----------------------|-----|--------------------|------|---------------------|---|---------------------|---|---------------------|-------|-----|-----|-------|---|---|
| act. | -                  | +   | -                    | +   | -                  | +    | -                   | + | -                   | + | -                   | +     |     |     |       |   |   |
| AcgA | -                  | -   | AccggA               | +   | +                  | AgcA | -                   | - | AcAgA               | - | +,-                 | TcAgC | -   | +   | TcACA | - | + |
| TcgT | -                  | -   | TccggT               | +   | +                  | TgcT | -                   | - | TcTgT               | - | +,-                 | GcTgA | -   | +   | TcACG | - | + |
| AcgT | -                  | -   | AccggT               | +   | +                  | AgcT | -                   | - | AcTgA               | - | +,-                 | TcTgC | -   | +   | TcAAA | - | - |
| AcgT | -                  | -   | AccggT               | +,- | +                  | AgcT | -                   | - | TcAgT               | - | +,-                 | GcAgA | -   | +   | TcAAG | - | - |
| AcgC | -                  | -   | AccggC               | +   | +                  | AgcC | -                   | - | AcCgA               | - | -                   | TcCgC | -   | -   | TcATA | - | - |
| GcgT | -                  | -   | GccggT               | +   | +                  | GgcT | -                   | - | TcGgT               | - | +,-                 | GcGgA | -   | +   | TcATG | - | - |
| AcgG | -                  | -   | AccggG               | +   | +                  | AgcG | -                   | - | AcGgA               | - | +,-                 | TcGgC | -   | +   | GcACA | - | + |
| CcgT | +,-                | +   | CccggT               | +,- | +                  | CgcT | -                   | - | TcCgT               | - | -                   | GcCgA | -   | -   | GcACG | - | + |
| TcgA | -                  | -   | TccggA               | +   | +                  | TgcA | -                   | - | AcAgT               | - | +                   | TcAgG | N/T | N/T | GcAAA | - | - |
| TcgA | -                  | -   | TccggA               | +,- | +                  | TgcA | -                   | - | AcTgT               | - | +,-                 | CcTgA | N/T | N/T | GcAAG | - | + |
| TcgC | -                  | -   | TccggC               | +   | +                  | TgcC | -                   | - | AcCgT               | - | -                   | TcTgG | -   | +,- | GcATA | - | - |
| GcgA | -                  | -   | GccggA               | +,- | +                  | GgcA | -                   | - | AcGgT               | - | +,-                 | CcAgA | +   | +   | GcATG | - | - |
| TcgG | -                  | +,- | TccggG               | +   | +                  | TgcG | -                   | - | AcAgC               | - | +                   | TcCgG | -   | -   |       |   |   |
| CcgA | +,-                | +   | CccggA               | +,- | +                  | CgcA | -                   | - | GcTgT               | - | +                   | CcGgA | +   | +   |       |   |   |
| CcgC | +                  | +   | CccggC               | +   | +                  | CgcC | -                   | - | AcTgC               | - | +,-                 | TcGgG | -   | +   |       |   |   |
| GcgG | -                  | -   | GccggG               | +   | +                  | GgcG | -                   | - | GcAgT               | - | +                   | CcCgA | +   | +   |       |   |   |
| CcgG | +                  | +   | CccggG               | +   | +                  | CgcG | -                   | - | AcCgC               | - | -                   | CcAgC | +   | +   |       |   |   |
| CcgG | +                  | +   | CccggG               | +,- | +                  | CgcG | -                   | - | GcGgT               | - | +                   | GcTgG | -   | -   |       |   |   |
| GcgC | -                  | +,- | GccggC               | +   | +                  | GgcC | -                   | - | AcGgC               | - | +                   | CcTgC | +   | +   |       |   |   |
| GcgC | -                  | -   | GccggC               | +,- | +                  | GgcC | -                   | - | GcCgT               | - | -                   | GcAgG | -   | -   |       |   |   |
|      |                    |     |                      |     |                    |      |                     |   | AcAgG               | + | +                   | CcCgC | +   | +   |       |   |   |
|      |                    |     |                      |     |                    |      |                     |   | CcTgT               | + | +                   | GcGgG | -   | -   |       |   |   |
|      |                    |     |                      |     |                    |      |                     |   | AcTgG               | - | -                   | CcGgC | N/T | N/T |       |   |   |
|      |                    |     |                      |     |                    |      |                     |   | CcAgT               | + | +                   | GcCgG | N/T | N/T |       |   |   |
|      |                    |     |                      |     |                    |      |                     |   | AcCgG               | - | -                   | CcAgG | +   | +   |       |   |   |
|      |                    |     |                      |     |                    |      |                     |   | CcGgT               | + | +                   | CcTgG | +   | +   |       |   |   |
|      |                    |     |                      |     |                    |      |                     |   | AcGgG               | - | +                   | CcCgG | +   | +   |       |   |   |
|      |                    |     |                      |     |                    |      |                     |   | CcCgT               | + | +                   | CcGgG | +   | +   |       |   |   |
|      |                    |     |                      |     |                    |      |                     |   | TcAgA               | - | +                   | GcAgC | -   | +   |       |   |   |
|      |                    |     |                      |     |                    |      |                     |   | TcTgA               | - | +,-                 | GcTgC | -   | +   |       |   |   |
|      |                    |     |                      |     |                    |      |                     |   | TcCgA               | - | -                   | GcCgC | -   | -   |       |   |   |
|      |                    |     |                      |     |                    |      |                     |   | TcGgA               | - | +,-                 | GcGgC | -   | +   |       |   |   |

**SOM Table S3. Results of oligonucleotide digestion by FspEI**

act. = activator; + = digested; - = undigested; +,- = partial digestion; N/T = not tested

## AspBHI

| set                 | N <sup>m</sup> cgN |     | Nc <sup>m</sup> cggN |     | Ng <sup>m</sup> cN |       | N <sup>m</sup> cNgN |     | N <sup>m</sup> cNgN |     | NccWggN |       |     |     |         |     |
|---------------------|--------------------|-----|----------------------|-----|--------------------|-------|---------------------|-----|---------------------|-----|---------|-------|-----|-----|---------|-----|
| act.                | -                  | +   | -                    | +   | -                  | +     | -                   | +   | -                   | +   | -       | +     |     |     |         |     |
| AcgA                | -                  | -   | AccggA               | -   | -                  | AgcA  | -                   | -   | AcAgA               | -   | +,-     | TcAgC | -   | +,- | AccaggA | -   |
| TcgT                | -                  | -   | TccggT               | -   | +,-                | TgcT  | -                   | +,- | TcTgT               | -   | -       | GcTgA | +   | -   | TcctggT | +/- |
| AcgT                | -                  | -   | AccggT               | -   | -                  | AgcT  | -                   | -   | AcTgA               | -   | +       | TcTgC | -   | +,- | AccaggT | -   |
| AcgT                | -                  | -   | AccggT               | -   | -                  | AgcT  | -                   | -   | TcAgT               | -   | -       | GcAgA | -   | +,- | AcctggT | -   |
| AcgC                | -                  | -   | AccggC               | -   | -                  | AgcC  | -                   | -   | AcCgA               | -   | +,-     | TcCgC | -   | +,- | AccaggC | -   |
| GcgT                | -                  | -   | GccggT               | -   | -                  | GgcT  | -                   | -   | TcGgT               | -   | -       | GcGgA | -   | +,- | GcctggT | -   |
| AcgG                | -                  | -   | AccggG               | -   | -                  | AgcG  | -                   | -   | AcGgA               | -   | +,-     | TcGgC | -   | -   | AccaggG | -   |
| CcgT                | -                  | -   | CccggT               | +   | +                  | CgcT  | +                   | +   | TcCgT               | -   | -       | GcCgA | -   | +,- | CcctggT | +   |
| TcgA                | -                  | -   | TccggA               | -   | +                  | TgcA  | -                   | +,- | AcAgT               | -   | -       | TcAgG | N/T | N/T | TccaggA | +   |
| TcgA                | -                  | -   | TccggA               | -   | +,-                | TgcA  | -                   | -   | AcTgT               | -   | -       | CcTgA | N/T | N/T | TcctggA | +   |
| TcgC                | -                  | -   | TccggC               | -   | +                  | TgcC  | -                   | +,- | AcCgT               | -   | -       | TcTgG | -   | +,- | TccaggC | +/- |
| GcgA                | -                  | -   | GccggA               | -   | -                  | GgcA  | -                   | -   | AcGgT               | -   | -       | CcAgA | +,- | +   | GcctggA | -   |
| TcgG                | -                  | +,- | TccggG               | +   | +                  | TgcG  | -                   | +,- | AcAgC               | -   | +,-     | TcCgG | -   | +,- | TccaggG | +   |
| CcgA                | -                  | +,- | CccggA               | +   | +                  | CgcA  | +,-                 | +   | GcTgT               | -   | +       | CcGgA | +,- | +   | CcctggA | +   |
| CcgC                | +                  | +   | CccggC               | +   | +                  | CgcC  | -                   | +,- | AcTgC               | -   | +       | TcGgG | -   | -   | CccaggC | +   |
| GcgG                | -                  | +,- | GccggG               | -   | -                  | GgcG  | -                   | -   | GcAgT               | -   | +,-     | CcCgA | +,- | +,- | GcctggG | -   |
| CcgG                | +                  | +   | CccggG               | +   | +                  | CgcG  | +,-                 | +   | AcCgC               | -   | +,-     | CcAgC | +   | +   | CccaggG | +   |
| CcgG                | +,-                | +   | CccggG               | +   | +                  | CgcG  | -                   | +   | GcGgT               | -   | +,-     | GcTgG | +   | +   | CcctggG | +   |
| GcgC                | -                  | +,- | GccggC               | -   | -                  | GgcC  | -                   | -   | AcGgC               | -   | +,-     | CcTgC | +   | +   | GccaggC | -   |
| GcgC                | -                  | -   | GccggC               | -   | -                  | GgcC  | -                   | -   | GcCgT               | -   | +,-     | GcAgG | +   | +   | GcctggC | -   |
| K <sup>m</sup> cWHR |                    |     |                      |     |                    |       |                     |     | AcAgG               | +,- | +       | CcCgC | +   | +   | AcctggA | -   |
| TcACA               | -                  | -   | CcTgT                | +   | +                  | GcGgG | +                   | +,- | TccaggT             | -   |         |       |     |     |         |     |
| TcACG               | -                  | -   | AcTgG                | +,- | +                  | CcGgC | +,-                 | +,- | AcctggC             | -   |         |       |     |     |         |     |
| TcAAA               | -                  | -   | CcAgT                | -   | +                  | GcCgG | +,-                 | +,- | GccaggT             | -   |         |       |     |     |         |     |
| TcAAG               | -                  | -   | AcCgG                | -   | +,-                | CcAgG | +                   | +   | AcctggG             | -   |         |       |     |     |         |     |
| TcATA               | -                  | -   | CcGgT                | +,- | +                  | CcTgG | +                   | +   | CccaggT             | +   |         |       |     |     |         |     |
| TcATG               | -                  | -   | AcGgG                | -   | +,-                | CcCgG | +                   | +   | TcctggC             | +   |         |       |     |     |         |     |
| GcACA               | -                  | +   | CcCgT                | -   | +,-                | CcGgG | +                   | +   | GccaggA             | -   |         |       |     |     |         |     |
| GcACG               | -                  | +   | TcAgA                | -   | -                  | GcAgC | +                   | +   | TccaggG             | +   |         |       |     |     |         |     |
| GcAAA               | -                  | +,- | TcTgA                | -   | -                  | GcTgC | +,-                 | +   | CcctggA             | +   |         |       |     |     |         |     |
| GcAAG               | -                  | +   | TcCgA                | -   | -                  | GcCgC | +                   | +   | CccaggC             | +   |         |       |     |     |         |     |
| GcATA               | -                  | +,- | TcGgA                | -   | -                  | GcGgC | -                   | +,- | GcctggG             | -   |         |       |     |     |         |     |
| GcATG               | -                  | +,- |                      |     |                    |       |                     |     |                     |     |         |       |     |     |         |     |

### SOM Table S4. Results of oligonucleotide digestion by AspBHI

The activator used with AspBHI has a different sequence to fit AspBHI recognition site better. It's sequence is: CTCC<sup>m</sup>CAGGATCTTTTTTGATC<sup>m</sup>CTGGGAG

act. = activator; + = digested; - = undigested; +,- = partial digestion; N/T = not tested

**LpnPI**

| set  | N <sup>m</sup> cgN |     | Nc <sup>m</sup> cggN |     | Ng <sup>m</sup> cN |      | N <sup>m</sup> cNgN |                | N <sup>m</sup> cNgN |     | K <sup>m</sup> cWHR |       |     |     |       |   |     |
|------|--------------------|-----|----------------------|-----|--------------------|------|---------------------|----------------|---------------------|-----|---------------------|-------|-----|-----|-------|---|-----|
| act. | -                  | +   | -                    | +   | -                  | +    | -                   | +              | -                   | +   | -                   | +     |     |     |       |   |     |
| AcgA | -                  | -   | AccggA               | +   | +                  | AgcA | -                   | -              | AcAgA               | -   | +                   | TcAgC | -   | +   | TcACA | - | -   |
| TcgT | -                  | -   | TccggT               | +,- | +                  | TgcT | -                   | -              | TcTgT               | -   | +,-                 | GcTgA | +,- | +   | TcACG | - | -   |
| AcgT | -                  | -   | AccggT               | +,- | +                  | AgcT | -                   | -              | AcTgA               | -   | +                   | TcTgC | -   | +   | TcAAA | - | -   |
| AcgT | -                  | -   | AccggT               | +   | +                  | AgcT | -                   | -              | TcAgT               | -   | +,-                 | GcAgA | +   | +   | TcAAG | - | -   |
| AcgC | -                  | -   | AccggC               | +   | +                  | AgcC | -                   | -              | AcCgA               | -   | +                   | TcCgC | -   | -   | TcATA | - | -   |
| GcgT | -                  | -   | GccggT               | +   | +                  | GgcT | -                   | -              | TcGgT               | -   | +,-                 | GcGgA | -   | +   | TcATG | - | -   |
| AcgG | -                  | +,- | AccggG               | +   | +                  | AgcG | -                   | -              | AcGgA               | -   | +                   | TcGgC | -   | +   | GcACA | - | +   |
| CcgT | -                  | +,- | CccggT               | +,- | +                  | CgcT | -                   | -              | TcCgT               | -   | -                   | GcCgA | -   | -   | GcACG | - | +   |
| TcgA | -                  | -   | TccggA               | +   | +                  | TgcA | -                   | -              | AcAgT               | -   | +                   | TcAgG | N/T | N/T | GcAAA | - | -   |
| TcgA | -                  | -   | TccggA               | +   | +                  | TgcA | -                   | +,-            | AcTgT               | -   | +,-                 | CcTgA | N/T | N/T | GcAAG | - | +,- |
| TcgC | -                  | -   | TccggC               | +   | +                  | TgcC | -                   | -              | AcCgT               | -   | -                   | TcTgG | -   | +   | GcATA | - | -   |
| GcgA | -                  | -   | GccggA               | +   | +                  | GgcA | -                   | +,-            | AcGgT               | -   | +,-                 | CcAgA | +   | +   | GcATG | - | -   |
| TcgG | -                  | +,- | TccggG               | +   | +                  | TgcG | -                   | -              | AcAgC               | -   | +                   | TcCgG | -   | -   |       |   |     |
| CcgA | -                  | +   | CccggA               | +   | +                  | CgcA | -                   | + <sup>!</sup> | GcTgT               | +,- | +                   | CcGgA | +,- | +   |       |   |     |
| CcgC | -                  | +   | CccggC               | +   | +                  | CgcC | -                   | -              | AcTgC               | -   | +                   | TcGgG | -   | +   |       |   |     |
| GcgG | -                  | +   | GccggG               | +   | +                  | GgcG | -                   | -              | GcAgT               | +,- | +                   | CcCgA | -   | +,- |       |   |     |
| CcgG | +                  | +   | CccggG               | +   | +                  | CgcG | -                   | -              | AcCgC               | -   | -                   | CcAgC | +   | +   |       |   |     |
| CcgG | +                  | +   | CccggG               | +   | +                  | CgcG | -                   | -              | GcGgT               | -   | +                   | GcTgG | +   | +   |       |   |     |
| GcgC | -                  | +   | GccggC               | +   | +                  | GgcC | -                   | -              | AcGgC               | -   | +                   | CcTgC | +   | +   |       |   |     |
| GcgC | -                  | +   | GccggC               | +   | +                  | GgcC | -                   | -              | GcCgT               | -   | -                   | GcAgG | +   | +   |       |   |     |
|      |                    |     |                      |     |                    |      |                     |                | AcAgG               | N/T | +                   | CcCgC | -   | +,- |       |   |     |
|      |                    |     |                      |     |                    |      |                     |                | CcTgT               | N/T | +                   | GcGgG | +,- | +   |       |   |     |
|      |                    |     |                      |     |                    |      |                     |                | AcTgG               | -   | +                   | CcGgC | +,- | N/T |       |   |     |
|      |                    |     |                      |     |                    |      |                     |                | CcAgT               | +   | +                   | GcCgG | -   | N/T |       |   |     |
|      |                    |     |                      |     |                    |      |                     |                | AcCgG               | -   | -                   | CcAgG | +   | +   |       |   |     |
|      |                    |     |                      |     |                    |      |                     |                | CcGgT               | +,- | +                   | CcTgG | +   | +   |       |   |     |
|      |                    |     |                      |     |                    |      |                     |                | AcGgG               | -   | +                   | CcCgG | -   | +,- |       |   |     |
|      |                    |     |                      |     |                    |      |                     |                | CcCgT               | -   | -                   | CcGgG | +,- | +   |       |   |     |
|      |                    |     |                      |     |                    |      |                     |                | TcAgA               | -   | +                   | GcAgC | +,- | +   |       |   |     |
|      |                    |     |                      |     |                    |      |                     |                | TcTgA               | -   | +                   | GcTgC | +,- | +   |       |   |     |
|      |                    |     |                      |     |                    |      |                     |                | TcCgA               | -   | -                   | GcCgC | -   | -   |       |   |     |
|      |                    |     |                      |     |                    |      |                     |                | TcGgA               | -   | +,-                 | GcGgC | -   | +   |       |   |     |

**SOM Table S5. Results of oligonucleotide digestion by LpnPI**

act. = activator; + = digested; - = undigested; +,- = partial digestion; N/T = not tested

## RlaI

| set  | N <sup>m</sup> cgN |   | Nc <sup>m</sup> cggN |   | Ng <sup>m</sup> cN |      | N <sup>m</sup> cNgN |   | N <sup>m</sup> cNgN |     | K <sup>m</sup> cWHR |       |     |     |       |   |     |
|------|--------------------|---|----------------------|---|--------------------|------|---------------------|---|---------------------|-----|---------------------|-------|-----|-----|-------|---|-----|
| act. | -                  | + | -                    | + | -                  | +    | -                   | + | -                   | +   | -                   | +     |     |     |       |   |     |
| AcgA | -                  | - | AccggA               | - | -                  | AgcA | -                   | - | AcAgA               | -   | +,-                 | TcAgC | -   | -   | TcACA | - | -   |
| TcgT | -                  | - | TccggT               | - | -                  | TgcT | -                   | - | TcTgT               | -   | -                   | GcTgA | +,- | +   | TcACG | - | -   |
| AcgT | -                  | - | AccggT               | - | -                  | AgcT | -                   | - | AcTgA               | -   | +,-                 | TcTgC | -   | -   | TcAAA | - | -   |
| AcgT | -                  | - | AccggT               | - | -                  | AgcT | -                   | - | TcAgT               | -   | +,-                 | GcAgA | +   | +   | TcAAG | - | -   |
| AcgC | -                  | - | AccggC               | - | -                  | AgcC | -                   | - | AcCgA               | -   | -                   | TcCgC | -   | -   | TcATA | - | -   |
| GcgT | -                  | - | GccggT               | - | -                  | GgcT | -                   | - | TcGgT               | -   | -                   | GcGgA | -   | -   | TcATG | - | -   |
| AcgG | -                  | - | AccggG               | - | -                  | AgcG | -                   | - | AcGgA               | -   | -                   | TcGgC | -   | -   | GcACA | - | +,- |
| CcgT | -                  | - | CccggT               | - | -                  | CgcT | -                   | - | TcCgT               | -   | -                   | GcCgA | -   | -   | GcACG | - | +,- |
| TcgA | -                  | - | TccggA               | - | -                  | TgcA | -                   | - | AcAgT               | -   | +                   | TcAgG | N/T | N/T | GcAAA | - | -   |
| TcgA | -                  | - | TccggA               | - | -                  | TgcA | -                   | - | AcTgT               | -   | +                   | CcTgA | N/T | N/T | GcAAG | - | -   |
| TcgC | -                  | - | TccggC               | - | -                  | TgcC | -                   | - | AcCgT               | -   | -                   | TcTgG | -   | -   | GcATA | - | -   |
| GcgA | -                  | - | GccggA               | - | -                  | GgcA | -                   | - | AcGgT               | -   | -                   | CcAgA | +   | +   | GcATG | - | -   |
| TcgG | -                  | - | TccggG               | - | -                  | TgcG | -                   | - | AcAgC               | +,- | +                   | TcCgG | -   | -   |       |   |     |
| CcgA | -                  | - | CccggA               | - | -                  | CgcA | -                   | - | GcTgT               | +   | +                   | CcGgA | -   | -   |       |   |     |
| CcgC | -                  | - | CccggC               | - | -                  | CgcC | -                   | - | AcTgC               | -   | +                   | TcGgG | -   | -   |       |   |     |
| GcgG | -                  | - | GccggG               | - | -                  | GgcG | -                   | - | GcAgT               | -   | +                   | CcCgA | -   | -   |       |   |     |
| CcgG | -                  | - | CccggG               | - | -                  | CgcG | -                   | - | AcCgC               | -   | -                   | CcAgC | +   | +   |       |   |     |
| CcgG | -                  | - | CccggG               | - | -                  | CgcG | -                   | - | GcGgT               | -   | -                   | GcTgG | +   | +   |       |   |     |
| GcgC | -                  | - | GccggC               | - | -                  | GgcC | -                   | - | AcGgC               | -   | -                   | CcTgC | +   | +   |       |   |     |
| GcgC | -                  | - | GccggC               | - | -                  | GgcC | -                   | - | GcCgT               | -   | -                   | GcAgG | +   | +   |       |   |     |
|      |                    |   |                      |   |                    |      |                     |   | AcAgG               | +,- | +,-                 | CcCgC | -   | -   |       |   |     |
|      |                    |   |                      |   |                    |      |                     |   | CcTgT               | +   | +                   | GcGgG | -   | -   |       |   |     |
|      |                    |   |                      |   |                    |      |                     |   | AcTgG               | -   | +,-                 | CcGgC | N/T | N/T |       |   |     |
|      |                    |   |                      |   |                    |      |                     |   | CcAgT               | +   | +                   | GcCgG | N/T | N/T |       |   |     |
|      |                    |   |                      |   |                    |      |                     |   | AcCgG               | -   | -                   | CcAgG | +   | +   |       |   |     |
|      |                    |   |                      |   |                    |      |                     |   | CcGgT               | -   | -                   | CcTgG | +   | +   |       |   |     |
|      |                    |   |                      |   |                    |      |                     |   | AcGgG               | -   | -                   | CcCgG | -   | -   |       |   |     |
|      |                    |   |                      |   |                    |      |                     |   | CcCgT               | -   | -                   | CcGgG | -   | -   |       |   |     |
|      |                    |   |                      |   |                    |      |                     |   | TcAgA               | -   | -                   | GcAgC | +   | +   |       |   |     |
|      |                    |   |                      |   |                    |      |                     |   | TcTgA               | -   | -                   | GcTgC | +   | +   |       |   |     |
|      |                    |   |                      |   |                    |      |                     |   | TcCgA               | -   | -                   | GcCgC | -   | -   |       |   |     |
|      |                    |   |                      |   |                    |      |                     |   | TcGgA               | -   | -                   | GcGgC | -   | -   |       |   |     |

**SOM Table S6. Results of oligonucleotide digestion by RlaI**

act. = activator; + = digested; - = undigested; +,- = partial digestion; N/T = not tested



**SgrTI**

| set  | N <sup>m</sup> c <sub>g</sub> N |      | Nc <sup>m</sup> c <sub>gg</sub> N |      | Ng <sup>m</sup> c <sub>N</sub> |      | N <sup>m</sup> c <sub>N</sub> gN |   | N <sup>m</sup> c <sub>N</sub> gN |      | K <sup>m</sup> c <sub>WHR</sub> |       |      |      |       |   |      |
|------|---------------------------------|------|-----------------------------------|------|--------------------------------|------|----------------------------------|---|----------------------------------|------|---------------------------------|-------|------|------|-------|---|------|
| act. | -                               | +    | -                                 | +    | -                              | +    | -                                | + | -                                | +    | -                               | +     |      |      |       |   |      |
| AcgA | -                               | -    | AccggA                            | +    | +                              | AgcA | -                                | - | AcAgA                            | -    | -                               | TcAgC | -    | -    | TcACA | - | -    |
| TcgT | -                               | -    | TccggT                            | +, - | +, -                           | TgcT | -                                | - | TcTgT                            | -    | -                               | GcTgA | -    | -    | TcACG | - | -    |
| AcgT | -                               | -    | AccggT                            | +    | +                              | AgcT | -                                | - | AcTgA                            | -    | -                               | TcTgC | -    | -    | TcAAA | - | -    |
| AcgT | -                               | -    | AccggT                            | +    | +                              | AgcT | -                                | - | TcAgT                            | -    | -                               | GcAgA | -    | +, - | TcAAG | - | -    |
| AcgC | -                               | -    | AccggC                            | +    | +                              | AgcC | -                                | - | AcCgA                            | -    | -                               | TcCgC | -    | -    | TcATA | - | -    |
| GcgT | -                               | -    | GccggT                            | +    | +                              | GgcT | -                                | - | TcGgT                            | -    | -                               | GcGgA | -    | +, - | TcATG | - | +, - |
| AcgG | -                               | -    | AccggG                            | +    | +                              | AgcG | -                                | - | AcGgA                            | -    | -                               | TcGgC | -    | +, - | GcACA | - | +, - |
| CcgT | -                               | -    | CccggT                            | +    | +, -                           | CgcT | -                                | - | TcCgT                            | -    | -                               | GcCgA | -    | -    | GcACG | - | -    |
| TcgA | -                               | -    | TccggA                            | +    | +                              | TgcA | -                                | - | AcAgT                            | -    | -                               | TcAgG | N/T  | N/T  | GcAAA | - | -    |
| TcgA | -                               | -    | TccggA                            | -    | +, -                           | TgcA | -                                | - | AcTgT                            | -    | -                               | CcTgA | N/T  | N/T  | GcAAG | - | -    |
| TcgC | -                               | -    | TccggC                            | +    | +                              | TgcC | -                                | - | AcCgT                            | -    | -                               | TcTgG | -    | -    | GcATA | - | -    |
| GcgA | -                               | -    | GccggA                            | +    | +                              | GgcA | -                                | - | AcGgT                            | -    | -                               | CcAgA | +, - | +, - | GcATG | - | -    |
| TcgG | -                               | -    | TccggG                            | +    | +                              | TgcG | -                                | - | AcAgC                            | -    | -                               | TcCgG | -    | -    |       |   |      |
| CcgA | -                               | -    | CccggA                            | +, - | +                              | CgcA | -                                | - | GcTgT                            | -    | -                               | CcGgA | +, - | +, - |       |   |      |
| CcgC | +                               | +    | CccggC                            | +    | +                              | CgcC | -                                | - | AcTgC                            | -    | -                               | TcGgG | -    | +, - |       |   |      |
| GcgG | -                               | -    | GccggG                            | +    | +                              | GgcG | -                                | - | GcAgT                            | -    | +, -                            | CcCgA | -    | -    |       |   |      |
| CcgG | +                               | +    | CccggG                            | +    | +                              | CgcG | -                                | - | AcCgC                            | -    | -                               | CcAgC | +    | +    |       |   |      |
| CcgG | -                               | +    | CccggG                            | +    | +                              | CgcG | -                                | - | GcGgT                            | -    | +, -                            | GcTgG | -    | +, - |       |   |      |
| GcgC | -                               | +, - | GccggC                            | +    | +                              | GgcC | -                                | - | AcGgC                            | -    | -                               | CcTgC | +    | +    |       |   |      |
| GcgC | -                               | -    | GccggC                            | +    | +                              | GgcC | -                                | - | GcCgT                            | -    | -                               | GcAgG | -    | +    |       |   |      |
|      |                                 |      |                                   |      |                                |      |                                  |   | AcAgG                            | -    | +, -                            | CcCgC | -    | +, - |       |   |      |
|      |                                 |      |                                   |      |                                |      |                                  |   | CcTgT                            | -    | +                               | GcGgG | -    | +, - |       |   |      |
|      |                                 |      |                                   |      |                                |      |                                  |   | AcTgG                            | -    | -                               | CcGgC | N/T  | N/T  |       |   |      |
|      |                                 |      |                                   |      |                                |      |                                  |   | CcAgT                            | +, - | +                               | GcCgG | N/T  | N/T  |       |   |      |
|      |                                 |      |                                   |      |                                |      |                                  |   | AcCgG                            | -    | -                               | CcAgG | +    | +    |       |   |      |
|      |                                 |      |                                   |      |                                |      |                                  |   | CcGgT                            | +    | +                               | CcTgG | +    | +    |       |   |      |
|      |                                 |      |                                   |      |                                |      |                                  |   | AcGgG                            | -    | -                               | CcCgG | -    | -    |       |   |      |
|      |                                 |      |                                   |      |                                |      |                                  |   | CcCgT                            | -    | -                               | CcGgG | +    | +    |       |   |      |
|      |                                 |      |                                   |      |                                |      |                                  |   | TcAgA                            | -    | -                               | GcAgC | -    | -    |       |   |      |
|      |                                 |      |                                   |      |                                |      |                                  |   | TcTgA                            | -    | -                               | GcTgC | -    | -    |       |   |      |
|      |                                 |      |                                   |      |                                |      |                                  |   | TcCgA                            | -    | -                               | GcCgC | -    | -    |       |   |      |
|      |                                 |      |                                   |      |                                |      |                                  |   | TcGgA                            | -    | -                               | GcGgC | -    | -    |       |   |      |

**SOM Table S7. Results of oligonucleotide digestion by SgrTI**

act. = activator; + = digested; - = undigested; +,- = partial digestion; N/T = not tested

| 32mer sequence                                       | Fold coverage | Chromosomal location | annotation |
|------------------------------------------------------|---------------|----------------------|------------|
| GCAAGCTCCGCCTCC <b>CGGGTT</b> CACGCCATTCT <b>AGA</b> | 26338         | chr2:51986532        | LINE       |
| CCATTCCATTGCACT <b>CGGGTT</b> GATTCCATTCC <b>AGA</b> | 18616         | chr10:41700263       | satellite  |
| GCAACCTCCACCTCC <b>CGGGTT</b> CAAGTGATTCT <b>AGA</b> | 17554         | chr6:134284045       | SINE       |
| GCAACCTCTGCCTCC <b>CGGGTT</b> CAAGTGATTCT <b>AGA</b> | 10223         | chr6:135196586       | SINE       |
| ATCATCGAATGGACC <b>CGAAT</b> GGAATCATCATC <b>AGA</b> | 8723          | chr2:90962496        | satellite  |
| ACAACCTCCGCCTCC <b>CGGGTT</b> CAAGCAATTCT <b>AGA</b> | 6780          | chr19:19604248       | SINE       |
| AGTGAGCTGAGATCG <b>CGCCACT</b> GCACTCCAAGAAC         | 5711          | chr18:58867453       | SINE       |
| ACAACCTCCACCTCC <b>CGGGTT</b> CAAGTGATTCT <b>AGA</b> | 3789          | chr21:20516162       | SINE       |
| GAGGCGGGCGGATCA <b>CGAGGT</b> CAGGAGATCGA <b>AGA</b> | 3692          | chr5:14662943        | SINE       |
| TGGAGTGCAGTGGCG <b>CGATCT</b> TGGCTCACTAG <b>AGA</b> | 3513          | chr12:97703314       | SINE       |

**SOM Table S8. Top 10 32mer from MspJI digested IMR90 genomic DNA. Central CG site (red), P2 adaptor (blue).**

**Synthetic coding sequences of MspJI-like enzymes:**

>MspJI

ATGAACGGCCCGAAAGCCGATATTGCGTGGGGCGGCTGCGCAAGTCGCGAACAAGCCGGTCTGGTCTTCGTGGGCGA  
CGAGCTGCGTTACGCCAGGGTGCCAACCAGCGTGATGTCGAGCTGGATGGTTTCGTTAATTACCATTGGCTGACTAGCC  
CTGGTGGCTTAGGTCTGCCGAAAGTTATGTTGGAAGCAGGTATTAATGCGCCTGCCGAAGTGGTGGGTCCGGATCGCAGC  
CGTCGTGCGCTGATTGCAATCCGCAGCTCACCGTGGAAAGCTGGTCATGAAACGAACCCTTGGCACGATGAGTTTGATT  
AGATCATGGTCATGTCCGCTACTTTGGTGACCACAAGCCAAGTACCCTGGCTTACCTGGTGAAGCTAAAGGCAACCCTG  
TGGTGTGGAAGCCGCCGCTGTCATGCCGGTACCACCCGCGAAGAACGCTTACTGGTCCACCACCTGTTCTTATTTTCGT  
GCCGTGACTGTTTCATCGCGCGGGTCGCGCAAGTTGTTAAAGCCATGTGGAATTCTGCGGTGCTGCAATCATTGAACGCCT  
GGAGCACGTCGTGCAGCGTGATCCAGAACTGGTCGCTCTTTTCTAATCTGAGTTTAGATCTGGCCGTGGTGAAGTGGT  
GTGAGATCGATGGTGTGGATTTTCGCTGGATCGACGATCGCCGAATGCAGCGCTGGCCGACGGCGAGACCTTACGCCAC  
GCACCCGAGTCATGGATCCGCTGGGTGCGCCAGGGTCGTTTAGCGATTCCGGGTATCCGCCGCCGCGTGTAGCGTCTGC  
CGTGCAGAGCAGCAAAGAACAACAGCCAGCGAGCGGTAGTGCAGAAAGCAGCCACTCTGCAGACGTTATATAAATTTTATG  
ACGGTCGTAAGCATGCTTTTGAATTGCTGGCTTACAGTGTGGCGGCCGAGGTGTTTCGTGAAAGCGGTGCACGCTACAAA  
GAAGGTTGGTGTACGTTTCATCTGGTACGTTGGTGTGGACTTTATTGGTTCGTATCGACATGGGTTTCATTGAAAGCATC  
AACCCCGTTGTTGTTTTAGCCAGGCGAAATGATTACCGCAGACTTTCAGTTAGCCCGAGCAGGTGAAAGCGCGCTGG  
TCGCCCGCTTGCGCCGCGGTTGGATCGGCGTGTACGTGACTACGGGTAGCTTTTACGCCAAGCCCAAGTGGAAATTATC  
GATGACCAATACCCGGTGGTTTTAATTGCTGGTGGCAGCTGGCAGCCACAGTGCCTGATGGTTCAGGCGAACTATGG  
CGGCGATTTAGACGCCCTGCTGGCTAGCACTGTGGACGAATACGGTGGCGCTGTGACTACCCGCCCTCTGAAGAAGTTA  
TTTCTCTGTAA

>FspEI

ATGCAGTCTACCGGTGTGCGTCCATGTCCACTGGCGAGCGTTGCTGTTGCGACGGAAGTTGCTACCCCTGGCGGTGCGTC  
TGATGCGCGTGTCTGGATGAACCGTCCAGCGGCCTGGGCTCTCTGCGTGCAGTGGACGACAAATCTCAGGTAGTCCCGT  
TCGTAGATCTGCCGACCGCTGCTCTGGTTGTGGACCAGCTGTACGAAGCGCGCACCGCTGGTACTCTGGCGGACGACCCG  
CTGGCGCGTCTGCTGCCGGTGGTAACCAAGGCGGCTTCCGTTACGCAGGTTCTCCTCGAAAGGCACCGTACGCTGTGC  
TGTTCTGTACACTACTGGTGTGTGGCAGATTGGCCGGACACTCTGGACCCGCTACTGGCGTATTCACTTATTACGGCG  
ATAACCGTAAACCTGGCCGCGACCTGCACGACACCCAACGTTCTGGTAACTGCTGCTGCGTGCAGTTTTCGAACATGCA  
CACGGCTCCGTTGAAGAACGCCGACTGTCCCCTTCTCTGCTGTTGAAACCGCGCCGCCGGGTGCTGCGATCATGTT  
TCGTGGTCTGCTGGCCCCGGGCGCCGCGACCCTGACTTCTGACGACGATCTGGTGGCAATCTGGCGCAACACTCGCGGT  
ACCGTTTCCAGAACTATCGTGCTCACTTTACTGTTCTGGACGTTGCTACGGTGACCCGCACTTGGCTGACCGATATCCTG  
GCTGGCCACGCGACGGACTCTGAACACTGTCTCTGCTGGACTGCTTGGTTCGATGGTTCGTCGCTACTCTCCACTGAT  
CGCGCGTCTACCACCATCATCCGTACCAAGCGGAACAGCAGCTCCTGATCCTACTGGTGTAGCGATCCTGGCAGCAA  
TCCGCGAACACTATCGTGGTCACGAACACGACTTCGAGTTTTGTGCTGTTGAACTGTGGCGTCTGATCGCTCCGGCTACT  
GGCCGTTGCGACGTTACCCCTCCTTCTGTCGACGGCGGTCGTGACGCGATCGGCGACTACATCCTGGGTCCGCTGTCTGA  
TCCGATTGCGATCGATTTTGTCTGAGGGCGAAATGCTACACCGATACTAATTCTGTGCGGCTTCGTGATGTAGCCCGCC  
TGATTTCCCGTCTGCGTACCCGCCACTTCCGGCTGTTCAATTACCACGACCACTTTAACCAGCAAGTTTATACTGAAGTG  
CGTACCGACCGTACCCGATCGCACTGGTTCGGTTCGTGATATCGTCAATGCCCTGCGCGCTCATGGTTACGCAGACGT  
AAACGCCGTGAACGCTTGGCTGGGCAAGATTCCGAACGTTACGATATCTGCTAAAGGCGCTCCGAACCCGTAA

>LpnPI

ATGAAAATCTACTCTTTTCGACACGCTGGCTAACCGGATCTGATCATCGACGAGTTTACGAAGGTGGTAGCAGCGGTAA  
TGCTTCTGACGACCCGATTTCTAAAATCATTAAAGGATTTGGTAACATGGGCGGTTTCCGTTCTGCTGGTACGGGATTT  
TCAAGAAACTGATCGTTCTGTACACCAACATGGAAGATGGCGATTGGCCTGACTCCATCGATACTTCTAAAGGCCAGTTC  
ATCTATTACGGTGATAACAAACATCCTGGTTCATGATTTACGATACGCCGCGTCAAGGTAACGCAACCCTGAAAATGCT  
GTTTCGATAGCACCCACAACGAAAAGGATGCTCGCCGATCGTTCCGCCAATCTTTATCTTCGTTAAGTATCCGACTGCCA  
GCTCCTCCCGCTCTGTTCAAGTTCAAAGGTGTGGCGGTCCCGGTTATCCGGGTCTGTCTGCAACCGATGACCTGATCGCC  
GTGTGGAAAAACGACCAACGGTACGCGTTTCCAGAACTATCGTGAATTTTCACTATTCTGAACATTCCGATGGTGTCTCG  
TAAATGGATCAATTTCTGTTTCGACCCGTTCCGGTCAAGATAACAGCTGAACCCATTTTATCAGTGGAAAATCTCCGGTA  
AAGCGGACGTTCTGATCGTCCGTCCCAAGACTATCCGCACTCAGATTGAGCAAAATGCCGCTACCAAACTGGAGCGT  
GAAATTCTGCAAGCTGTGTTTCGACTACTTCTGCGAAGCTCCTATCAAATTCGAAGCATGTGCTGCCAAAATCTTTAGCT  
GTACGACGAGAACGTAAGTACTGATCGACGAAATTAATCGCTCCGACGTCGATGGCGGTAAGGACGCTATTGGTTCGCTATGTT  
TGGGTATCAAAGAAGATCCGGTTTACGCAGAGTCTTTCTGGAAGCCAAATGTTACCAGCCAGGTCTGAACGGTCAAAT  
ATTAACAGCGTCCGGGTGAAAGAGGATCCCGTCTGATTTCTCGTATCAAAGATCGTCAAGTTTGGTGTACTGGTACCAC  
CAGCTTCAATTGCAAAAACAGGCTTACGGTGAAGTTCGTGAAGATGGTCAACCTATTGTGTTCTGTCCGGTGGTGACATCT  
CTCGATCCTGATTAAGAAAGGATCAACTTACCAGTGTGTTCTGGCATGGCTGAACAGCGAATTTAGCAAAAAGCTAA

>RlaI

ATGCAGCGCATCGCTTTTCGAGAAACTGAAAACCGCGGACCTGTTTGTAGATGCTGTCTACGAATCTAACGGTGCCACCAA  
CCTGAATGGCGACGTGCTGTCCAAACTGATGTCCGTGGGTACGCAGGGCGGTTTTCGTCCTGTCAACATTCGCAACCAGA  
AGGGTAAGGCGGCCTACATCGTTCTGGAAAGCACCAACAAACATCCGGACTGGCTGGACAACATCGACTATGAAAGCGGG  
ATCATCCAATATTATGGTGACAACCGCGAACCAGGTCGTGAACTGCATGATTCTAAGCGTGGTGGCAACAAAGTACTGCG  
CGATGTGTTTCGAAATGCTGCAGGACAACCGTCTGTCAGGAGATTCCACCTTTCTTCTATTTTGAAGCGAAGAGGGTCTGTA  
ACCGTCCGTTCTGGGTCTGCTGGTCCCGGGCAGCGATAAATCAAACCTGGAAGAAGTCTGGTGGCGATTTGGCGCATG

AAGAACGGTGAACGTTATCAGAACTACAAAGCAGTGTTTACCATCCTGGATGTGGCAAGCGTTTCCCGCGGTTGGCTGGA  
AGATCTGCTGTCTGGTAACGGTTATCAGAGCGATTTCGCGCCTAAAGAATGGAAGAAGTGGATCGACAAAGGCGTTTATA  
CCCCGCTGTACGCATCCGATTCTGTCTGAACTATCGTACTCAAGATCAACAAATGCCGTTCAAAGACGACGACAAGCAG  
AAACTGCAGAGCATCTACGACTATTTGACAACCCGTATGAATTCGAAAAGTGC GCGATGAAAATCGTTCAACTGATGGA  
TTCTAACATCCACTCCCTGAAACACACCCGTTTCGTACGTGATGGCGGTCGTGATGCGATCGGCCTGTACCGTATCGGCC  
GCCAATGCGATGGTGTAGATGTGGAATTTGCGCTGGAGGCAAAAACGCTATTCCAGCAACGATGGTATCGGCCTAAAGAA  
GTTAGCCGTCTGATTTCTCGTCTGCGCCACCGCCAGTTCCGGTATTCTGGTTACTACCTCTTTCGTCGCTCTGCAGGCATA  
CCAGGAAATCAAGGAAGATGGTCATCCAATTGTGATCATTAGCGGTATGGACATCCTGCGTATCCTGTACGATAGCGGTA  
TCAAAACCAAAGATGAAATTCAGAATGGCTGGTAAAACCTTCCCGAAAGACGAATAA

>AspBHI

ATGACCTTCTTTACCGGCGAGACCCTGGGTCAAGTAGACCTGATCGTAGATGCTGTTTATGCAGGTTATAAACTGAACG  
TGGCGGTATGGCGGACCCGCTGGTGCCGCTGGTGGGTGTAAGCCGTCAGGGCGGCTTTCGTTACCGTGGTACCCGTGAAC  
GTCCGACTCTGCTGGTGTGCTGACCTCTAACCTGGCAGAACC GGAATGGCCGGATCAGCTGGACGAACTACTGGCACTTTC  
ATCTACTACGGCGATAACCGTCATCCTGGTCTGCTGCTGATGACACCCCTCGTTTCGGTAACCAGCTGCTGCGTCAGAT  
CTTCGATTGGGCACACCTGGGTCAGCGTCACCTGGTTCCGCGGATCCTGGTGTTCACCACTGAAGCTACTGGCCGACCT  
TCCGTTTTTCGCGGTCTGGCAGTTCGGGCTCCCGGCTCTGGCAGCGACTGAAGATCTGGTTCGCGCTGTGGAAAACCACT  
GAAGGTCAGCGTTTTCAAAAATTATAAAGCAGTGTTTACCATTCTGGACGAAGCCGTTATTCCGCGCGCATGGGTTACGC  
GGTCGGTCTGGCGAAACTTCTGGTCTGGCACCTGTGGCTTGAATGCCTGGCTGTCCGCTGGCGGTATCCGCCACTGA  
TGGTCCGCGTAGCCTGCTGGTTCGTTCTAAAGCTGAACAGCTGCCTGCGACTCCTGAAGATCAGGCTCTGATTGAAGTA  
ATTCGTCAACGTTATAAAGAAAACCCGTTTCGGTTTCGAAGCATGCGCGGGCGCGCTGACCCGCTGCTGCTGCCTGATGT  
TGCAGTCTGGACCTGACCCGTCCTTGGCGTGACGGCGGTCGTGACGGCATCGGCCGCTGCGCATTGGCCAGTCTCCGG  
CAGCGATCGAAGTTGATTTTCGCGCTGGAGGCTAAATGCTACGGTGCCAATAACGCTGTTGGTGTGAAAGAAGTTAGCCGT  
CTGATTTCCCGTATTAACACCCGTGAATTTGGTGTCTGGTAACCACGTCTATGTGATCGTCAAGCCTACCAGGAAGT  
AACCGACGACGGTACCCGGTATTCTGACGACCGCCAGGATATCGTGGGTCTGCTGCGTTCGCTGGTGTTCGTACCC  
CGACTCAGGTAGACGCTTGGCTGGACGGTATTACGGCAAGCGTGTA

## References:

1. Bitinaite J, Rubino M, Varma KH, Schildkraut I, Vaisvila R, & Vaiskunaite R (2007) USER friendly DNA engineering and cloning method by uracil excision. *Nucleic Acids Res* 35, 1992-2002.
2. Zheng Y, Cohen-Karni D, Xu D, Chin HG, Wilson G, Pradhan S, & Roberts RJ (2010) A unique family of Mrr-like modification-dependent restriction endonucleases. *Nucleic Acids Res*.
3. Georgopoulos CP & Revel HR (1971) Studies with glucosyl transferase mutants of the T-even bacteriophages. *Virology* 44, 271-285.
4. Langmead B, Trapnell C, Pop M, & Salzberg SL (2009) Ultrafast and memory-efficient alignment of short DNA sequences to the human genome. *Genome Biol* 10, R25.
5. Crooks GE, Hon G, Chandonia JM, & Brenner SE (2004) WebLogo: a sequence logo generator. *Genome Res* 14, 1188-1190.
6. Lister R, Pelizzola M, Dowen RH, Hawkins RD, Hon G, Tonti-Filippini J, Nery JR, Lee L, Ye Z, Ngo QM, *et al.* (2009) Human DNA methylomes at base resolution show widespread epigenomic differences. *Nature* 462, 315-322.
